# Supplementary material for: Current freezing and thawing scenarios employed by North Atlantic fisheries: their potential role in Newfoundland and Labrador’s northern cod (Gadus morhua) fishery
Source: PeerJ. 2021 Dec 10;9:e12526. doi: 10.7717/peerj.12526 (PMC8667752; doi:10.7717/peerj.12526)
Supplement: Supplemental Information 3 [file peerj-09-12526-s003.xlsx]

## Sheet: Sheet1
Year	Fish & Freezing	Fish & Thawing
2017	299	70
2018	322	84
2019	332	101
2020	345	96
2021	57	23
